# Supplementary material
Source: HighWire-hosted journal article supplement (https://bjsm.bmj.com/content/51/17/1265)
Supplement: inline-supplementary-material-1 [file inline-supplementary-material-1.pdf]

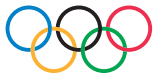

INTERNATIONAL  
OLYMPIC  
COMMITTEE

# Daily Report on Injuries and Illnesses

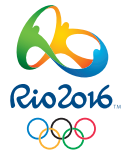

NOC

Report by (name)

Date of report

/2016

Contact details (e-mail/tel.)

Please report: (1) All injuries (traumatic and overuse) and (2) all illnesses newly incurred in competition or training during the Olympic Games regardless of the consequences with respect to absence from competition or training. The information provided is for medical and research purposes and will be treated confidentially.

## 1. Injury – Example

Definitions and codes of 1 to 6 see reverse

|                                                 |                   |                                                   |                  |                                                            |                   |                                                    |  |
|-------------------------------------------------|-------------------|---------------------------------------------------|------------------|------------------------------------------------------------|-------------------|----------------------------------------------------|--|
| athlete's accreditation no.<br><i>123456789</i> |                   | sport and event<br><i>athletics, 100m (women)</i> |                  | round, heat or training<br><i>quarter final / 1st heat</i> |                   | date and time of injury<br><i>7.8.2016 - 14:35</i> |  |
| injured body part, side<br><i>wrist, left</i>   | code<br><i>15</i> | type of injury<br><i>sprain</i>                   | code<br><i>8</i> | cause of injury<br><i>slipped and fell</i>                 | code<br><i>21</i> | absence in days<br><i>10</i>                       |  |

|                             |      |                 |      |                         |      |                         |  |
|-----------------------------|------|-----------------|------|-------------------------|------|-------------------------|--|
| athlete's accreditation no. |      | sport and event |      | round, heat or training |      | date and time of injury |  |
| injured body part           | code | type of injury  | code | cause of injury         | code | absence in days         |  |

|                             |      |                 |      |                         |      |                         |  |
|-----------------------------|------|-----------------|------|-------------------------|------|-------------------------|--|
| athlete's accreditation no. |      | sport and event |      | round, heat or training |      | date and time of injury |  |
| injured body part           | code | type of injury  | code | cause of injury         | code | absence in days         |  |

|                             |      |                 |      |                         |      |                         |  |
|-----------------------------|------|-----------------|------|-------------------------|------|-------------------------|--|
| athlete's accreditation no. |      | sport and event |      | round, heat or training |      | date and time of injury |  |
| injured body part           | code | type of injury  | code | cause of injury         | code | absence in days         |  |

|                             |      |                 |      |                         |      |                         |  |
|-----------------------------|------|-----------------|------|-------------------------|------|-------------------------|--|
| athlete's accreditation no. |      | sport and event |      | round, heat or training |      | date and time of injury |  |
| injured body part           | code | type of injury  | code | cause of injury         | code | absence in days         |  |

## 2. Illness – Example

Definitions and codes of 1 2 7 8 and 9 see reverse

|                                                     |                  |                                          |                     |                                       |                  |                                         |  |
|-----------------------------------------------------|------------------|------------------------------------------|---------------------|---------------------------------------|------------------|-----------------------------------------|--|
| athlete's accreditation no.<br><i>1564579587979</i> |                  | sport and event<br><i>football (men)</i> |                     | diagnosis<br><i>tonsillitis, cold</i> |                  | occurred on (date)<br><i>02.08.2016</i> |  |
| affected system<br><i>respiratory</i>               | code<br><i>1</i> | main symptom(s)<br><i>fever, pain</i>    | code<br><i>1, 2</i> | cause of illness<br><i>infection</i>  | code<br><i>2</i> | absence in days<br><i>2</i>             |  |

|                             |      |                 |      |                  |      |                    |  |
|-----------------------------|------|-----------------|------|------------------|------|--------------------|--|
| athlete's accreditation no. |      | sport and event |      | diagnosis        |      | occurred on (date) |  |
| affected system             | code | main symptom(s) | code | cause of illness | code | absence in days    |  |

|                             |      |                 |      |                  |      |                    |  |
|-----------------------------|------|-----------------|------|------------------|------|--------------------|--|
| athlete's accreditation no. |      | sport and event |      | diagnosis        |      | occurred on (date) |  |
| affected system             | code | main symptom(s) | code | cause of illness | code | absence in days    |  |

No injury or illness in any athlete of our team today

Please use additional forms if needed.

# Codes and classifications

## 1 Estimated duration of absence from training or competition (in days)

Please provide an estimate of the number of days that the athlete will not be able to undertake his/her normal training programme or will not be able to compete.

0 = 0 days  
1 = 1 day  
2 = 2 days

7 = 1 week  
14 = 2 weeks  
21 = 3 weeks

28 = 4 weeks  
> 30 = more than 4 weeks  
> 180 = 6 months or more

## 2 Sport and event

Please state the event. For example: swimming – 4x100m freestyle relay (women); track – 110m hurdles (men); taekwondo – under 58kg (men); cycling – team sprint (women)

## For Injuries

---

## 3 Round, heat or training

If the injury occurred during **competition**, please state the **round** (e.g. heats, qualification B, final).

If the injury occurred on **another occasion**, please specify whether it was training, warm-up or other.

## 4 Injured body part (location of injury)

### Head and trunk

- 1 face (incl. eye, ear, nose)
- 2 head
- 3 neck / cervical spine
- 4 thoracic spine / upper back
- 5 sternum / ribs
- 6 lumbar spine / lower back
- 7 abdomen
- 8 pelvis / sacrum / buttock

### Upper extremity

- 11 shoulder / clavicle
- 12 upper arm
- 13 elbow
- 14 forearm
- 15 wrist
- 16 hand
- 17 finger
- 18 thumb

### Lower extremity

- 21 hip
- 22 groin
- 23 thigh (a: anterior / p: posterior)
- 24 knee (m: medial / l: lateral)
- 25 lower leg (a: anterior / p: posterior)
- 26 Achilles tendon
- 27 ankle (m: medial / l: lateral)
- 28 foot / toe

## 5 Type of injury (diagnosis)

- 1 concussion (regardless of loss of consciousness)
- 2 fracture (traumatic)
- 3 stress fracture (overuse)
- 4 other bone injuries
- 5 dislocation, subluxation
- 6 tendon rupture
- 7 ligamentous rupture

- 8 sprain (injury of joint and/or ligaments)
- 9 lesion of meniscus or cartilage
- 10 strain / muscle rupture / tear
- 11 contusion / haematoma / bruise
- 12 tendinosis / tendinopathy
- 13 arthritis / synovitis / bursitis
- 14 fasciitis / aponeurosis injury

- 15 impingement
- 16 laceration / abrasion / skin lesion
- 17 dental injury / broken tooth
- 18 nerve injury / spinal cord injury
- 19 muscle cramps or spasm
- 20 other

## 6 Cause of injury

- 1 overuse (gradual onset)
- 2 overuse (sudden onset)
- 3 non-contact trauma
- 4 recurrence of previous injury

- 11 contact with another athlete
- 12 contact: moving object (e.g. puck)
- 13 contact: stagnant object (e.g. pole)
- 14 violation of rules (obstruction, pushing)

- 21 field of play conditions
- 22 weather condition
- 23 equipment failure
- 24 other

## For Illnesses

---

## 7 Affected system

- 1 respiratory / ear, nose, throat
- 2 gastro-intestinal
- 3 uro-genital / gynaecological
- 4 cardio-vascular

- 5 allergic / immunological
- 6 metabolic / endocrinological
- 7 haematological
- 8 neurological / psychiatric

- 9 dermatologic
- 10 musculo-skeletal
- 11 dental
- 12 other

## 8 Main symptom(s)

- 1 fever
- 2 pain
- 3 diarrhoea, vomiting
- 4 dyspnoea, cough

- 5 palpitations
- 6 hyper-thermia
- 7 hypo-thermia
- 8 dehydration

- 9 syncope, collapse
- 10 anaphylaxis
- 11 lethargy, dizziness
- 12 other

## 9 Cause of illness / symptom(s)

- 1 pre-existing (e.g. asthma, allergy)
- 2 infection

- 3 exercise-induced
- 4 environmental

- 5 reaction to medication
- 6 other
