# Supplementary material
Source: HighWire-hosted journal article supplement (https://bjsm.bmj.com/content/51/17/1265)
Supplement: inline-supplementary-material-3 [file inline-supplementary-material-3.docx]

Online appendix 3. Number of injuries overall, injuries leading to time loss (≥1 day or >7 days of estimated absence), competition and training injuries, and illnesses overall in the Olympic sports (proportion of injured or ill athletes, %).

| **Olympic sport** |  | **Athletes**  **(n)** |  | **Injuries** | | | | | | |  | **All**  **illnesses** |
| --- | --- | --- | --- | --- | --- | --- | --- | --- | --- | --- | --- | --- |
| All |  | ≥1 day | >7 days |  | Competition | Training |
| Archery |  | 128 |  | 3 (2.3) |  | - | - |  | 2 (66.7) | - |  | 10 (7.8) |
| Athletics |  | 2367 |  | 249 (10.5) |  | 105 (4.4) | 55 (2.3) |  | 107 (43.0) | 136 (54.6) |  | 146 (6.2) |
| Aquatics |  |  |  |  |  |  |  |  |  |  |  |  |
| Diving |  | 135 |  | 12 (8.9) |  | - | - |  | 1 (8.3) | 7 (58.3) |  | 16 (11.9) |
| Open-water marathon |  | 51 |  | 2 (3.9) |  | - | - |  | 2 (100.0) | - |  | 6 (11.8) |
| Swimming |  | 906 |  | 23 (2.5) |  | 5 (0.6) | 1 (0.1) |  | 5 (21.7) | 17 (73.9) |  | 53 (5.8) |
| Synchronised swimming |  | 104 |  | 6 (5.8) |  | 4 (3.8) | 2 (1.9) |  | 2 (33.3) | 4 (66.7) |  | 10 (9.6) |
| Water polo |  | 258 |  | 50 (19.4) |  | 17 (6.6) | 4 (1.6) |  | 32 (64.0) | 9 (18.0) |  | 13 (5.0) |
| Badminton |  | 172 |  | 15 (8.7) |  | 3 (1.7) | 2 (1.2) |  | 6 (85.7) | 8 (53..3) |  | 12 (7.0) |
| Basketball |  | 287 |  | 22 (7.7) |  | 8 (2.8) | 4 (1.4) |  | 17 (77.3) | 5 (22.7) |  | 14 (4.9) |
| Beach volleyball |  | 96 |  | 7 (7.3) |  | 3 (3.1) | 2 (2.1) |  | 6 (85.7) | 1 (14.3) |  | 7 (7.3) |
| Boxing |  | 286 |  | 86 (30.1) |  | 31 (10.8) | 2 (0.7) |  | 75 (87.2) | 10 (11.6) |  | 14 (4.9) |
| Canoe |  |  |  |  |  |  |  |  |  |  |  |  |
| Slalom |  | 83 |  | - |  | - | - |  | - | - |  | 9 (10.8) |
| Sprint |  | 248 |  | 9 (3.6) |  | 2 (0.8) | - |  | 1 (11.1) | 7 (77.8) |  | 6 (2.4) |
| Cycling |  |  |  |  |  |  |  |  |  |  |  |  |
| BMX |  | 48 |  | 18 (37.5) |  | 9 (18.8) | 5 (10.4) |  | 14 (77.8) | 4 (22.2) |  | 1 (2.1) |
| MTB |  | 80 |  | 19 (23.8) |  | 4 (5.0) | 3 (3.8) |  | 7 (36.8) | 12 (63.2) |  | 4 (5.0) |
| Road |  | 216 |  | 12 (5.6) |  | 6 (2.8) | 2 (0.9) |  | 9 (75.0) | 3 (25.0) |  | 8 (3.7) |
| Track |  | 187 |  | 10 (5.3) |  | 4 (2.1) | 1 (0.5) |  | 5 (50.0) | 5 (50.0) |  | 6 (3.2) |
| Equestrian |  | 200 |  | 9 (4.5) |  | 3 (1.5) | 1 (0.5) |  | 3 (33.3) | 4 (44.4) |  | 21 (10.5) |
| Fencing |  | 204 |  | 17 (8.3) |  | 5 (2.5) | 2 (1.0) |  | 13 (76.5) | 4 (23.5) |  | 9 (4.4) |
| Football |  | 503 |  | 75 (14.9) |  | 38 (7.6) | 12 (2.4) |  | 58 (77.3) | 16 (21.3) |  | 25 (5.0) |
| Golf |  | 120 |  | 3 (2.5) |  | 1 (0.8) | - |  | 1 (33.3) | 2 (66.7) |  | 2 (1.7) |
| Gymnastics |  |  |  |  |  |  |  |  |  |  |  |  |
| Artistic |  | 194 |  | 26 (13.4) |  | 14 (7.2) | 8 (4.1) |  | 12 (46.2) | 14 (53.8) |  | 3 (1.5) |
| Rhythmic |  | 96 |  | 6 (6.3) |  | 2 (2.1) | - |  | 1 (16.7) | 4 (66.7) |  | 2 (2.1) |
| Trampoline |  | 32 |  | 1 (3.1) |  | - | - |  | - | - |  | - |
| Handball |  | 335 |  | 49 (14.6) |  | 20 (6.0) | 9 (2.7) |  | 39 (79.6) | 10 (20.4) |  | 6 (1.8) |
| Hockey |  | 384 |  | 47 (12.2) |  | 15 (3.9) | 5 (1.2) |  | 40 (85.1) | 7 (14.9) |  | 18 (4.7) |
| Judo |  | 390 |  | 44 (11.3) |  | 19 (4.9) | 12 (3.1) |  | 32 (72.7) | 11 (25.0) |  | 10 (2.6) |
| Modern pentathlon |  | 72 |  | 3 (4.2) |  | 1 (1.4) | - |  | 2 (66.7) | 1 (33.3) |  | 2 (2.8) |
| Rowing |  | 546 |  | 9 (1.6) |  | 2 (0.4) | - |  | 4 (44.4) | 5 (55.6) |  | 29 (5.3) |
| Rugby |  | 291 |  | 54 (18.6) |  | 16 (5.5) | 9 (3.1) |  | 43 (79.6) | 8 (14.8) |  | 12 (4.1) |
| Sailing |  | 380 |  | 21 (5.5) |  | 2 (0.5) | 2 (0.5) |  | 12 (57.1) | 6 (28.6) |  | 45 (11.8) |
| Shooting |  | 390 |  | 8 (2.1) |  | 2 (0.5) | 1 (0.3) |  | 1 (12.5) | 6 (75.0) |  | 9 (2.3) |
| Table tennis |  | 172 |  | 5 (2.9) |  | 2 (1.2) | - |  | 2 (40.0) | 2 (40.0) |  | 7 (4.1) |
| Taekwondo |  | 127 |  | 30 (23.6) |  | 12 (9.4) | 4 (3.1) |  | 11 (36.7) | 16 (53.3) |  | 11 (8.7) |
| Tennis |  | 199 |  | 21 (10.6) |  | 10 (5.0) | 7 (3.5) |  | 18 (85.7) | 3 (14.3) |  | 5 (2.5) |
| Triathlon |  | 109 |  | 12 (11.0) |  | 6 (5.5) | 5 (4.6) |  | 8 (66.7) | 4 (33.3) |  | 6 (5.5) |
| Volleyball |  | 288 |  | 21 (7.3) |  | 8 (2.8) | 5 (1.7) |  | 11 (52.4) | 8 (38.1) |  | 11 (3.8) |
| Weightlifting |  | 256 |  | 34 (13.3) |  | 22 (8.6) | 12 (4.7) |  | 19 (55.9) | 14 (41.2) |  | 16 (6.3) |
| Wrestling |  | 349 |  | 44 (12.6) |  | 24 (6.9) | 19 (5.4) |  | 19 (43.2) | 24 (54.5) |  | 15 (4.3) |
| Total |  | 11 289a |  | 1101 (9.8)b |  | 438 (3.9) | 221 (2.0) |  | 651 (59.1)c | 405 (36.8)c |  | 613 (5.4)b |

aData include 15 double-starters. bInformation on sport/event missing in 19 injuries and 15 illnesses. cInformation on training/competition is missing in 45 injuries.
